# Supplementary material for: Colour tunable cool pigments based on TiZn2O4 inverse spinels
Source: Royal Society of Chemistry journal article supplement (doi:10.1039/d2ma00537a), 2022-01-01
Supplement: d2ma00537a1.pdf [file d2ma00537a1.pdf]

## Electronic Supplementary Information

### Colour tunable cool pigments based on $\text{TiZn}_2\text{O}_4$ inverse spinels

Deepak Joshy<sup>a</sup>, C. P. Jijil<sup>a</sup>, Sheethu Jose<sup>b</sup>, Yahya A. Ismail<sup>a</sup>, Pradeepan Periyat<sup>c\*</sup>

<sup>a</sup>Department of Chemistry, University of Calicut, Kerala, India-673635.

<sup>b</sup>Department of Chemistry, Central University of Kerala, India-671316

<sup>c</sup>Department of Environmental Studies, Kannur University, Kerala, India

E-mail:[pperiyat@uoc.ac.in](mailto:pperiyat@uoc.ac.in)/[pperiyat@kannuruniv.ac.in](mailto:pperiyat@kannuruniv.ac.in)

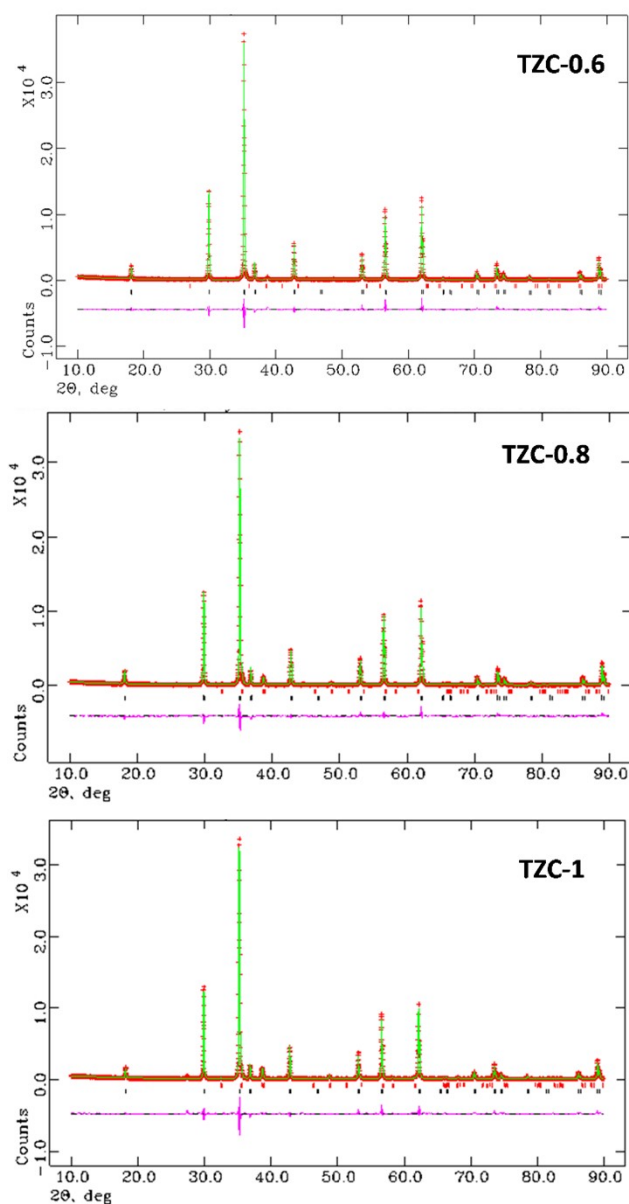

**Figure S1-** The experimental and refined patterns obtained on Rietveld analysis of TZC-0.6, TZC-0.8 and TZC-1 samples

**Table S1** - The fractional coordinates, sites occupied and extent of occupancy obtained upon Rietveld refinement for TZF-0.6, TZF-0.8 and TZF-1 composition

| TZC-0.6 |      |          |          |          |         |           |
|---------|------|----------|----------|----------|---------|-----------|
| Atom    | Site | x        | y        | z        | Uiso    | Occupancy |
| Zn(1)   | 8a   | 0.125    | 0.125    | 0.125    | 0.02135 | 1         |
| Ti      | 16d  | 0.5      | 0.5      | 0.5      | 0.01398 | 0.5       |
| Zn(2)   | 16d  | 0.5      | 0.5      | 0.5      | 0.01331 | 0.2       |
| Cu      | 16d  | 0.5      | 0.5      | 0.5      | 0.01701 | 0.3       |
| O       | 32e  | 0.257709 | 0.257709 | 0.257709 | 0.02291 | 1         |
| TZC-0.8 |      |          |          |          |         |           |
| Atom    | Site | x        | y        | z        | Uiso    | Occupancy |
| Zn(1)   | 8a   | 0.125    | 0.125    | 0.125    | 0.01915 | 1         |
| Ti      | 16d  | 0.5      | 0.5      | 0.5      | 0.01069 | 0.5       |
| Zn(2)   | 16d  | 0.5      | 0.5      | 0.5      | 0.00132 | 0.1       |
| Cu      | 16d  | 0.5      | 0.5      | 0.5      | 0.02192 | 0.4       |
| O       | 32e  | 0.260400 | 0.260400 | 0.260400 | 0.02022 | 1         |
| TZC-1   |      |          |          |          |         |           |
| Atom    | Site | x        | y        | z        | Uiso    | Occupancy |
| Zn      | 8a   | 0.125    | 0.125    | 0.125    | 0.01876 | 1         |
| Ti      | 16d  | 0.5      | 0.5      | 0.5      | 0.01396 | 0.5       |
| Cu      | 16d  | 0.5      | 0.5      | 0.5      | 0.02094 | 0.5       |
| O       | 32e  | 0.257047 | 0.257047 | 0.257047 | 0.02313 | 1         |

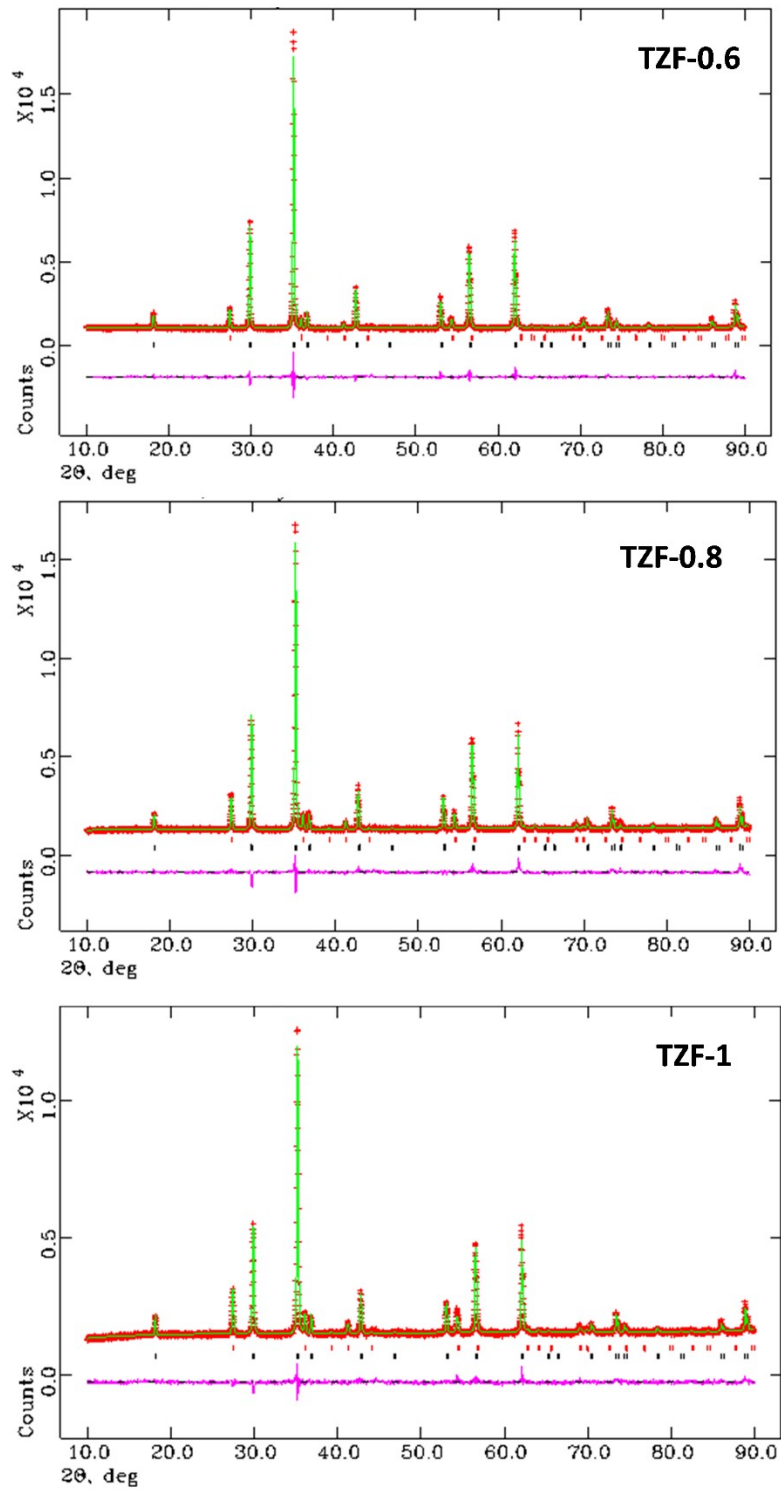

**Figure S2-** The experimental and refined patterns obtained on Rietveld analysis of TZF-0.6, TZF-0.8 and TZF-1 samples

**Table S2** - The fractional coordinates, sites occupied and extent of occupancy obtained upon Rietveld refinement for TZF-0.6, TZF-0.8 and TZF-1 composition

| TZF-0.6 |      |          |          |          |         |           |
|---------|------|----------|----------|----------|---------|-----------|
| Atom    | Site | x        | Y        | z        | Uiso    | Occupancy |
| Zn(1)   | 8a   | 0.125    | 0.125    | 0.125    | 0.01784 | 1         |
| Ti      | 16d  | 0.5      | 0.5      | 0.5      | 0.00340 | 0.5       |
| Zn(2)   | 16d  | 0.5      | 0.5      | 0.5      | 0.00674 | 0.2       |
| Fe      | 16d  | 0.5      | 0.5      | 0.5      | 0.0250  | 0.3       |
| O       | 32e  | 0.259159 | 0.259159 | 0.259159 | 0.01668 | 1         |
| TZF-0.8 |      |          |          |          |         |           |
| Atom    | Site | x        | y        | z        | Uiso    | Occupancy |
| Zn(1)   | 8a   | 0.125    | 0.125    | 0.125    | 0.01995 | 1         |
| Ti      | 16d  | 0.5      | 0.5      | 0.5      | 0.02500 | 0.5       |
| Zn(2)   | 16d  | 0.5      | 0.5      | 0.5      | 0.02500 | 0.1       |
| Fe      | 16d  | 0.5      | 0.5      | 0.5      | 0.0250  | 0.4       |
| O       | 32e  | 0.259902 | 0.259902 | 0.259902 | 0.01520 | 1         |
| TZF-1   |      |          |          |          |         |           |
| Atom    | Site | x        | y        | z        | Uiso    | Occupancy |
| Zn      | 8a   | 0.125    | 0.125    | 0.125    | 0.02145 | 1         |
| Ti      | 16d  | 0.5      | 0.5      | 0.5      | 0.02500 | 0.5       |
| Fe      | 16d  | 0.5      | 0.5      | 0.5      | 0.00213 | 0.5       |
| O       | 32e  | 0.260221 | 0.260221 | 0.260221 | 0.01354 | 1         |

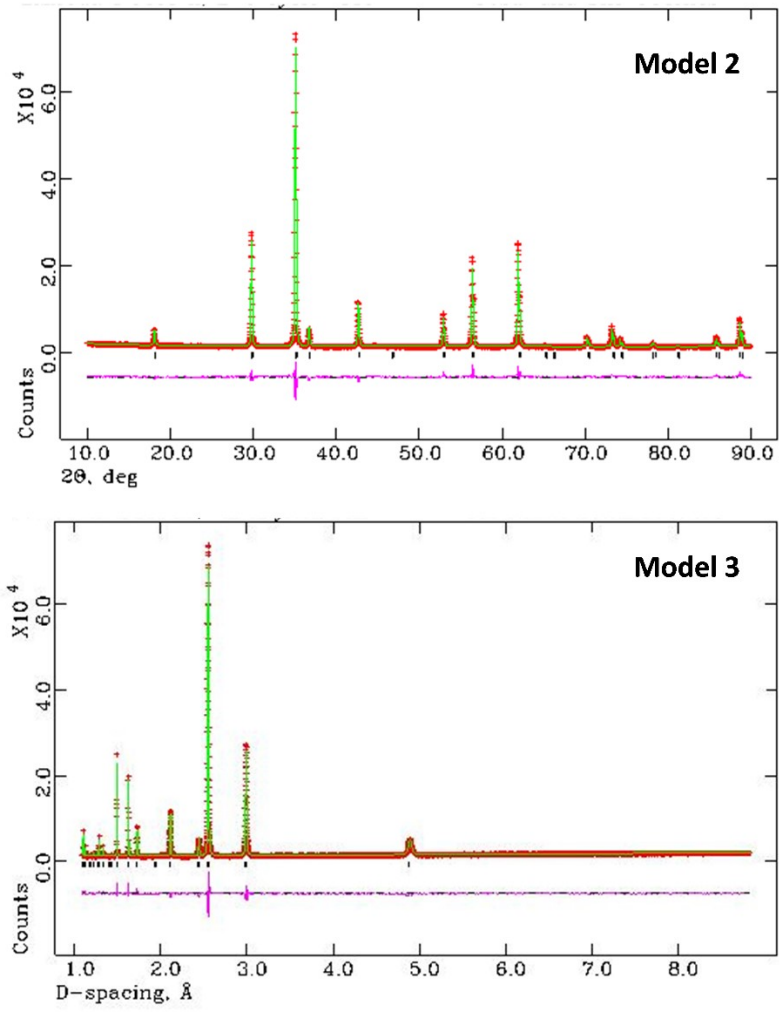

**Figure S3-** The experimental and refined patterns obtained on Rietveld analysis of TZF-0.2 as per model 2 and 3.

**Table S3** - The fractional coordinates, sites occupied and extent of occupancy obtained upon Rietveld refinement for TZF-0.2 as per model 2 and 3.

| <b>Model 2</b> |             |          |          |          |             |                  |
|----------------|-------------|----------|----------|----------|-------------|------------------|
| <b>Atom</b>    | <b>Site</b> | <b>x</b> | <b>y</b> | <b>z</b> | <b>Uiso</b> | <b>Occupancy</b> |
| <b>Zn(1)</b>   | 8a          | 0.125    | 0.125    | 0.125    | 0.01240     | 0.8              |
| <b>Ti</b>      | 16d         | 0.5      | 0.5      | 0.5      | 0.01245     | 0.5              |
| <b>Zn(2)</b>   | 16d         | 0.5      | 0.5      | 0.5      | 0.02060     | 0.5              |
| <b>Fe</b>      | 8a          | 0.125    | 0.125    | 0.125    | 0.02500     | 0.2              |
| <b>O</b>       | 32e         | 0.257162 | 0.257162 | 0.257162 | 0.01976     | 1                |
| <b>Model 3</b> |             |          |          |          |             |                  |
| <b>Atom</b>    | <b>Site</b> | <b>x</b> | <b>y</b> | <b>z</b> | <b>Uiso</b> | <b>Occupancy</b> |
| <b>Zn(1)</b>   | 8a          | 0.125    | 0.125    | 0.125    | 0.01456     | 0.9              |
| <b>Ti</b>      | 16d         | 0.5      | 0.5      | 0.5      | 0.01055     | 0.5              |
| <b>Zn(2)</b>   | 16d         | 0.5      | 0.5      | 0.5      | 0.01936     | 0.45             |
| <b>Fe(1)</b>   | 8a          | 0.125    | 0.125    | 0.125    | 0.01986     | 0.1              |
| <b>Fe(2)</b>   | 16d         | 0.5      | 0.5      | 0.5      | 0.0250      | 0.05             |
| <b>O</b>       | 32e         | 0.25848  | 0.25848  | 0.25848  | 0.0250      | 1                |

**Table S4** - The percentages of main and secondary phases calculated through Rietveld refinement for the developed pigment compositions.

| Composition | Percentage of phases present                                    |
|-------------|-----------------------------------------------------------------|
| TZ          | 90.01 (Main phase)<br>7.57 (ZnO)<br>2.366 (ZnTiO <sub>3</sub> ) |
| TZC-0.2     | 91.29 (Main phase)<br>8.70 (ZnO)                                |
| TZC-0.4     | 93.7 (Main phase)<br>6.3 (ZnO)                                  |
| TZC-0.6     | 99.5 (Main phase)<br>0.49 (TiO <sub>2</sub> )                   |
| TZC-0.8     | 94.36 (Main phase)<br>5.63 (CuO)                                |
| TZC-1       | 92.73 (Main phase)<br>7.263 (CuO)                               |
| TZF-0.2     | 100 (Main phase)                                                |
| TZF-0.4     | 100 (Main phase)                                                |
| TZF-0.6     | 90.72 (Main phase)<br>9.2 (TiO <sub>2</sub> )                   |
| TZF-0.8     | 86.65 (Main phase)<br>13.34 (TiO <sub>2</sub> )                 |
| TZF-1       | 77.11 (Main phase)<br>22.88 (TiO <sub>2</sub> )                 |

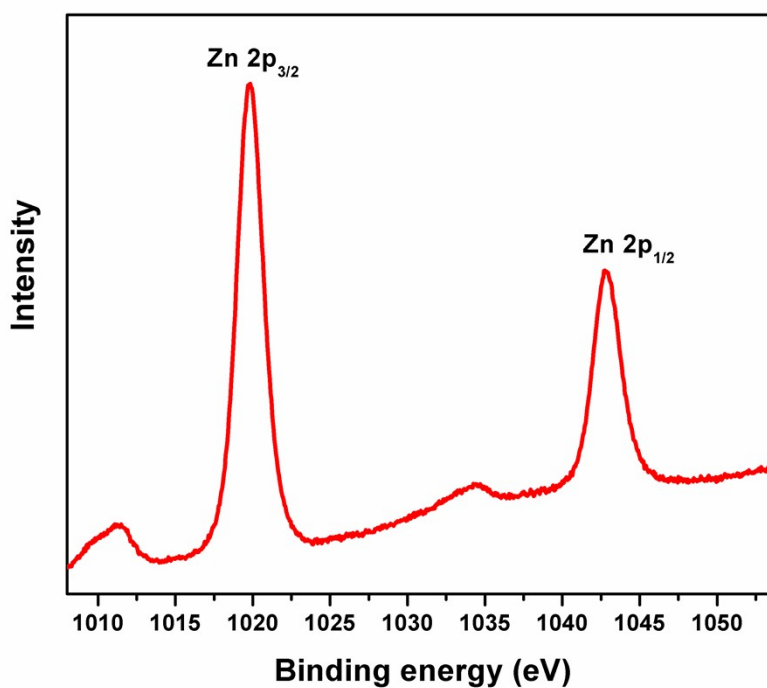

**Figure S4**- High resolution XPS of Zn 2p<sub>3/2</sub> and Zn 2p<sub>1/2</sub>

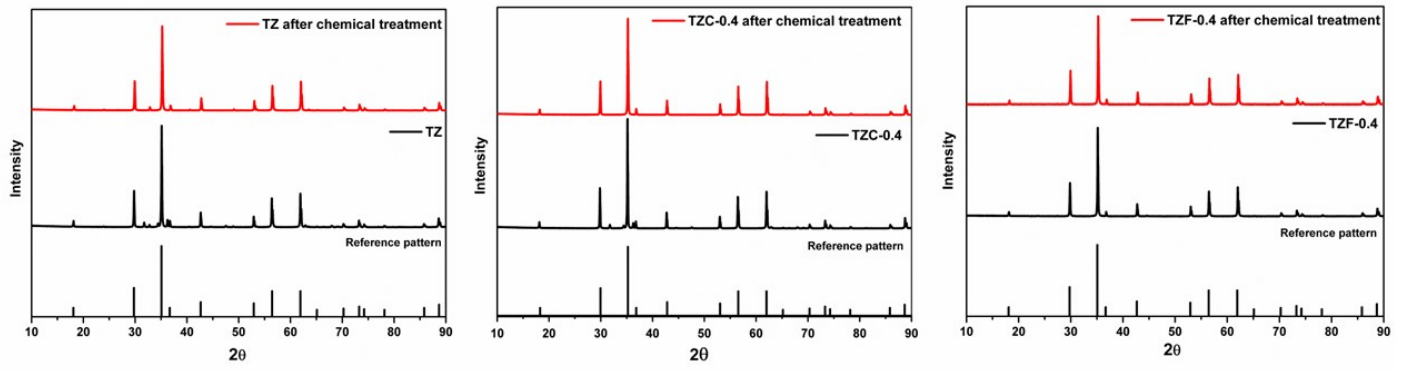

**Figure S5-** XRD patterns of TZ, TZO.4 and TZF.0.4 after chemical treatment, given in comparison with XRD patterns of reference and untreated samples.
